# Supplementary material for: Isolation and characterization of buffalo (bubalus bubalis) amniotic mesenchymal stem cells derived from amnion from the first trimester pregnancy
Source: PubMed Central journal article supplement — J Vet Med Sci. 2018 Mar 8;80(4):710–9. doi: 10.1292/jvms.17-0556 (PMC5938205; doi:10.1292/jvms.17-0556), 2018-03-08

Supplementary information, Figure S1

Different combinations of bFGF, forskolin and kenpaullone induced bAMSCs to differentiate into neurons, and  $\beta$  III-tubulin immunofluorescence for the neurons. Scale bars: 100  $\mu$ m. F: forskolin, K: kenpaullone.

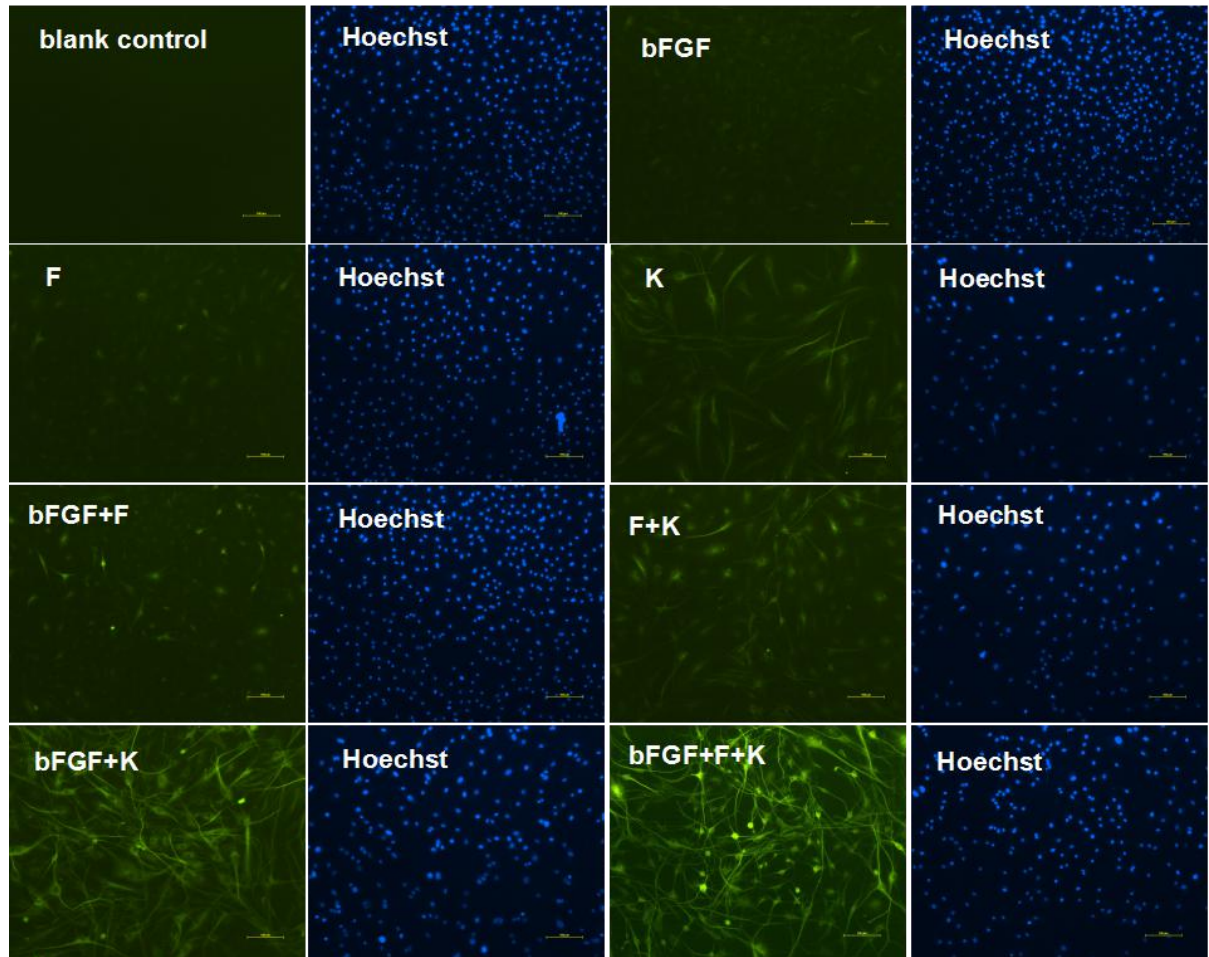

Supplement: jvms-80-710-s001.pdf [file jvms-80-710-s001.pdf]
